# Supplementary material
Source: PubMed Central journal article supplement (PMC2669361)
Supplement: 0900107106_0900107106SI.pdf [file 0900107106_0900107106SI.pdf]

# Supporting Information

Armeli and Leinwand 10.1073/pnas.0900107106

## SI Text

The change in mean residue ellipticity,  $\theta$ , as a function of temperature was modeled using a nonlinear least squares algorithm assuming the 2-state transition of a monomer from a folded to an unfolded state with a change in heat capacity,  $\Delta C_p$ , between the folded and unfolded forms.

The fraction folded at any temperature is

$$f_{F(t)} = (\theta_t - \theta_U) / (\theta_F - \theta_U),$$

where  $\theta_t$  is the observed ellipticity at a given temperature,  $\theta_F$  is the ellipticity of fully folded protein, and  $\theta_U$  is the ellipticity of unfolded protein. The fraction of folded protein,  $f_{F(t)}$ , was used to determine  $\Delta G$ , with pretransition and posttransition baseline corrections applied that are assumed to be linearly dependent on temperature,

$$f_{F(t)} = y \times ((\theta_F + (\theta_{F,1} \times t)) - (\theta_U + (\theta_{U,1} \times t))) + (\theta_U + (\theta_{U,1} \times t)),$$

where  $\theta_{F,1}$  is the linear correction of the mean residue ellipticity of the folded protein as a function of temperature,  $\theta_{U,1}$  is the linear correction of the mean residue ellipticity of the unfolded protein as a function of temperature,  $t$  is the observed temperature and

$$y = \exp[-\Delta G/RT] / [1 + \exp(-\Delta G/RT)].$$

$\Delta G$  is the Gibbs free energy of folding, which is given by the Gibbs-Helmholtz equation,

$$\Delta G = \Delta H(1 - t/T_m) + \Delta C_p(t - T_m) - t \times \ln(t/T_m),$$

where  $\Delta H$  is the enthalpy of unfolding,  $T_m$  is the temperature midpoint of the melting transition, and  $\Delta C_p$  is the change in heat capacity associated with unfolding. These thermodynamic parameters were fit using the program Kaleidagraph, and the entropy,  $\Delta S$ , was calculated at the  $T_m$  (where  $K = 1$ ) using

$$\Delta S = \Delta H/T_m.$$

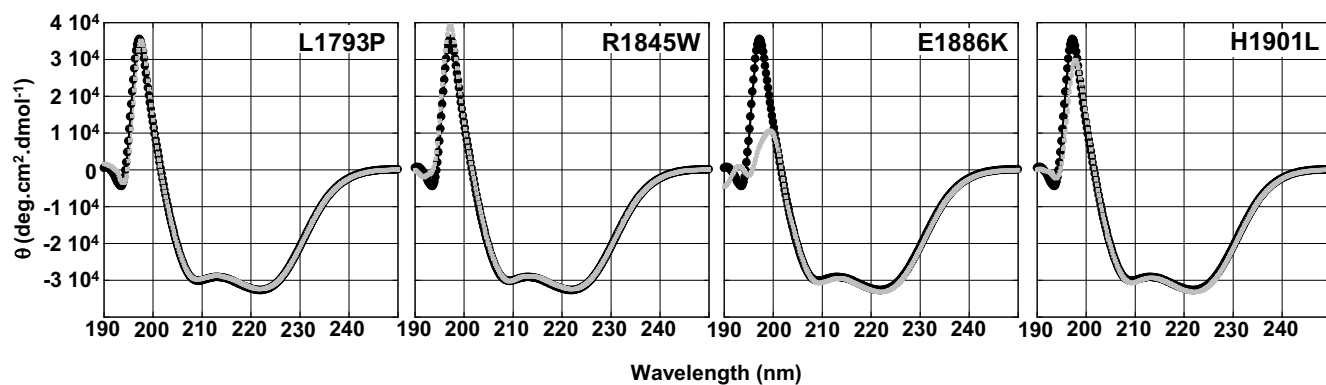

**Fig. S1.** Mutations associated with MSM do not alter the secondary structure of the protein. Far-UV CD spectra for wild type (black) and mutant (gray) LMM were determined in high salt buffer (300 mM NaCl, 10 mM TES, 3.5 mM EDTA, 1 mM TCEP, pH 7.3) at 4 °C. Under these conditions, wild type, L1793P, R1845W, E1886K, and H1901L LMM all display canonical  $\alpha$ -helical spectra, with characteristic minima at 208 nm and 222 nm.

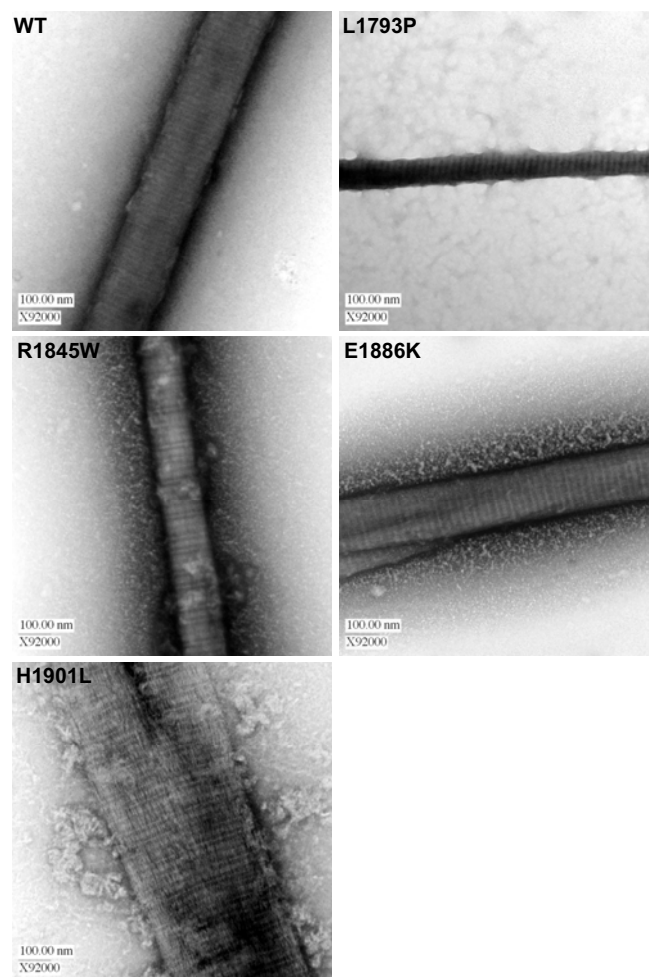

**Fig. S2.** Paracrystals formed by mutant LMM are morphologically indistinguishable from those formed by WT protein. WT and mutant LMM were each dialyzed from high salt buffer to low salt buffer to induce paracrystal formation. Electron micrographs were then recorded at a magnification of  $\times 92,000$ , and image manipulation software was used to determine measurements of paracrystal periodicity.

**Table S1. LMM paracrystal parameters**

|           | Striations, nm | $\pm$ | <i>n</i> |
|-----------|----------------|-------|----------|
| Wild type | 14.0           | 0.44  | 20       |
| L1793P    | 13.6           | 0.54  | 24       |
| R1845W    | 14.2           | 0.51  | 40       |
| E1886K    | 14.4           | 0.55  | 44       |
| H1901L    | 14.6           | 0.31  | 28       |
